# Supplementary material for: Evaluation of Annona muricata Acetogenins as Potential Anti-SARS-CoV-2 Agents Through Computational Approaches
Source: PubMed Central journal article supplement (PMC7958878; doi:10.3389/fchem.2020.624716), 2021-01-27
Supplement: datasheet1.pdf [file datasheet1.pdf]

## Supplementary Data

### **Evaluation of *Annona muricata* Acetogenins as Potential Anti-SARS-Cov-2 Agents Through Computational Approaches**

SARS-CoV-2 Spike Protein – Crystal structure

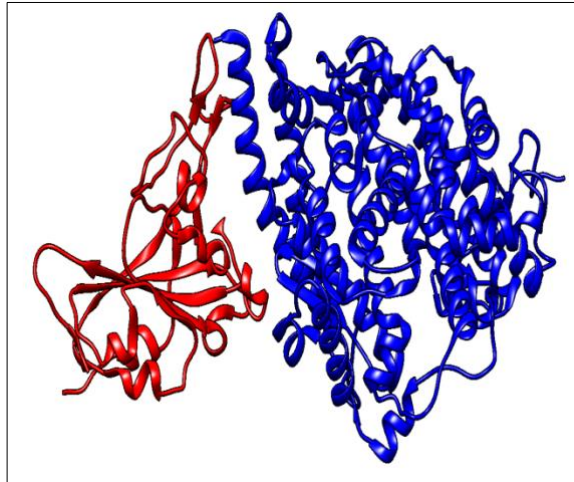

**Figure S1:** The crystal structure of corona virus spike (S) receptor (blue colored) - binding domain bound with ACE2 receptor (red colored) (PDB ID: 6M0J).

## Ligand-Protein Interaction

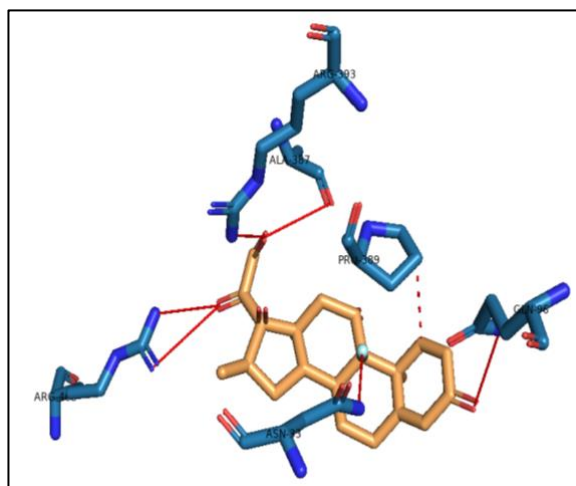

### Hydrophobic Interactions .....

| Index | Residue | AA  | Distance | Ligand Atom | Protein Atom |
|-------|---------|-----|----------|-------------|--------------|
| 1     | 389A    | PRO | 3.64     | 17          | 3033         |

### Hydrogen Bonds —

| Index | Residue | AA  | Distance H-A | Distance D-A | Donor Angle | Protein donor? | Sidechain | Donor Atom | Acceptor Atom |
|-------|---------|-----|--------------|--------------|-------------|----------------|-----------|------------|---------------|
| 1     | 96A     | GLN | 2.38         | 3.24         | 145.33      | ✓              | ✓         | 670 [Nam]  | 23 [O2]       |
| 2     | 387A    | ALA | 2.45         | 3.33         | 142.86      | ✗              | ✗         | 26 [O3]    | 3017 [O2]     |
| 3     | 393A    | ARG | 1.89         | 2.85         | 162.58      | ✓              | ✓         | 3072 [Ng+] | 26 [O3]       |
| 4     | 403E    | ARG | 2.36         | 3.31         | 160.96      | ✓              | ✓         | 5449 [Ng+] | 25 [O2]       |
| 5     | 403E    | ARG | 2.71         | 3.57         | 145.33      | ✓              | ✓         | 5448 [Ng+] | 25 [O2]       |

### Halogen Bonds —

| Index | Residue | AA  | Distance | Donor Angle | Acceptor Angle | Donor Atom | Acceptor Atom |
|-------|---------|-----|----------|-------------|----------------|------------|---------------|
| 1     | 33A     | ASN | 3.05     | 135.51      | 123.49         | 28 [F]     | 154 [Nam]     |

**Figure S2:** The detailed interaction of dexamethasone against SARS-CoV-2 spike protein.

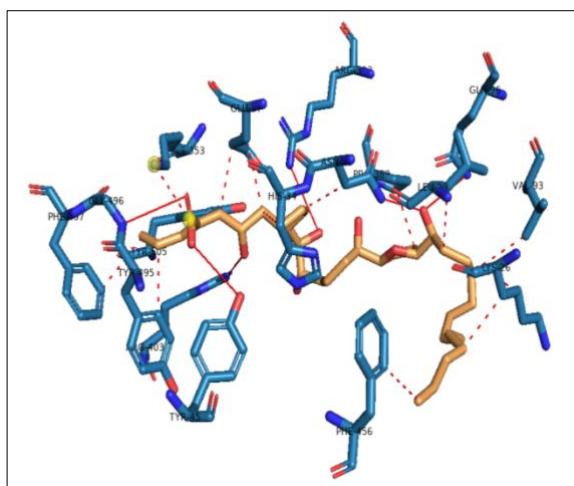

**Hydrophobic Interactions** ----

| Index | Residue | AA  | Distance | Ligand Atom | Protein Atom |
|-------|---------|-----|----------|-------------|--------------|
| 1     | 26A     | LYS | 3.42     | 17          | 107          |
| 2     | 26A     | LYS | 3.46     | 10          | 108          |
| 3     | 29A     | LEU | 3.87     | 9           | 134          |
| 4     | 33A     | ASN | 3.47     | 26          | 170          |
| 5     | 34A     | HIS | 3.99     | 28          | 178          |
| 6     | 37A     | GLU | 3.64     | 30          | 203          |
| 7     | 37A     | GLU | 3.64     | 28          | 202          |
| 8     | 93A     | VAL | 3.76     | 11          | 663          |
| 9     | 389A    | PRO | 3.83     | 6           | 3050         |
| 10    | 456E    | PHE | 3.68     | 20          | 5885         |
| 11    | 495E    | TYR | 3.54     | 34          | 6188         |
| 12    | 497E    | PHE | 3.64     | 35          | 6206         |
| 13    | 505E    | TYR | 3.84     | 30          | 6264         |

**Hydrogen Bonds** —

| Index | Residue | AA  | Distance H-A | Distance D-A | Donor Angle | Protein donor? | Sidechain | Donor Atom | Acceptor Atom |
|-------|---------|-----|--------------|--------------|-------------|----------------|-----------|------------|---------------|
| 1     | 33A     | ASN | 1.93         | 2.80         | 145.63      | ✓              | ✓         | 172 [Nam]  | 37 [O3]       |
| 2     | 96A     | GLN | 3.30         | 3.84         | 116.56      | ✓              | ✓         | 688 [Nam]  | 37 [O3]       |
| 3     | 393A    | ARG | 3.31         | 4.03         | 131.57      | ✓              | ✓         | 3090 [Ng+] | 42 [O3]       |
| 4     | 403E    | ARG | 2.37         | 2.88         | 112.00      | ✓              | ✓         | 5466 [Ng+] | 41 [O3]       |
| 5     | 453E    | TYR | 2.91         | 3.80         | 159.87      | ✓              | ✓         | 5859 [O3]  | 40 [O.co2]    |
| 6     | 453E    | TYR | 2.89         | 3.80         | 157.23      | ✗              | ✓         | 40 [O.co2] | 5859 [O3]     |
| 7     | 496E    | GLY | 3.25         | 3.92         | 126.20      | ✓              | ✗         | 6194 [Nam] | 39 [O.co2]    |

**Figure S3:** The detailed interaction of Annomuricin A against SARS-CoV-2 spike protein.

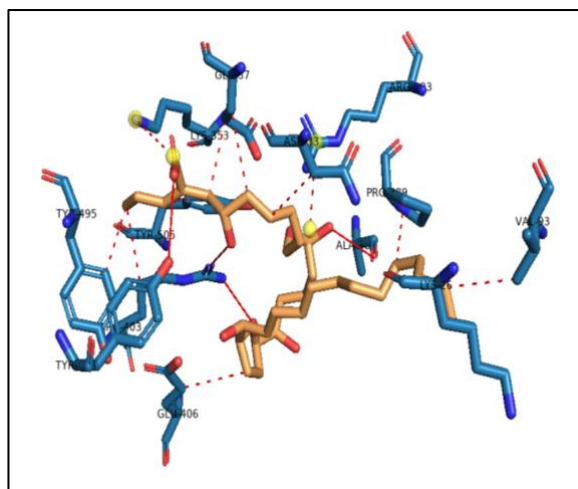

Hydrophobic Interactions - - -

| Index | Residue | AA  | Distance | Ligand Atom | Protein Atom |
|-------|---------|-----|----------|-------------|--------------|
| 1     | 26A     | LYS | 3.63     | 19          | 106          |
| 2     | 33A     | ASN | 3.97     | 26          | 168          |
| 3     | 37A     | GLU | 3.65     | 29          | 201          |
| 4     | 37A     | GLU | 3.97     | 27          | 200          |
| 5     | 93A     | VAL | 3.62     | 18          | 661          |
| 6     | 389A    | PRO | 3.81     | 15          | 3048         |
| 7     | 403E    | ARG | 3.96     | 34          | 5460         |
| 8     | 406E    | GLU | 3.83     | 5           | 5483         |
| 9     | 495E    | TYR | 3.75     | 34          | 6186         |
| 10    | 505E    | TYR | 3.96     | 31          | 6260         |
| 11    | 505E    | TYR | 3.59     | 29          | 6262         |

Hydrogen Bonds —

| Index | Residue | AA  | Distance H-A | Distance D-A | Donor Angle | Protein donor? | Sidechain | Donor Atom | Acceptor Atom |
|-------|---------|-----|--------------|--------------|-------------|----------------|-----------|------------|---------------|
| 1     | 387A    | ALA | 2.22         | 3.11         | 151.77      | ✘              | ✘         | 42 [O3]    | 3033 [O2]     |
| 2     | 403E    | ARG | 2.39         | 2.91         | 112.15      | ✔              | ✔         | 5464 [Ng+] | 41 [O3]       |
| 3     | 403E    | ARG | 2.68         | 3.06         | 103.73      | ✔              | ✔         | 5465 [Ng+] | 35 [O3]       |
| 4     | 453E    | TYR | 3.14         | 4.01         | 154.74      | ✔              | ✔         | 5857 [O3]  | 40 [O.co2]    |

**Figure S4:** The detailed interaction of Annomuricin B against SARS-CoV-2 spike protein.

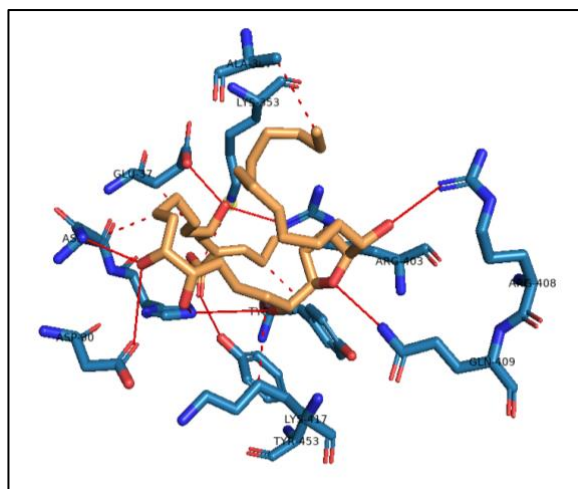

Hydrophobic Interactions - - -

| Index | Residue | AA  | Distance | Ligand Atom | Protein Atom |
|-------|---------|-----|----------|-------------|--------------|
| 1     | 33A     | ASN | 3.56     | 25          | 170          |
| 2     | 37A     | GLU | 3.60     | 30          | 202          |
| 3     | 387A    | ALA | 3.79     | 20          | 3036         |
| 4     | 417E    | LYS | 3.88     | 2           | 5565         |
| 5     | 495E    | TYR | 3.40     | 34          | 6188         |

Hydrogen Bonds —

| Index | Residue | AA  | Distance H-A | Distance D-A | Donor Angle | Protein donor? | Sidechain | Donor Atom | Acceptor Atom |
|-------|---------|-----|--------------|--------------|-------------|----------------|-----------|------------|---------------|
| 1     | 30A     | ASP | 2.99         | 3.55         | 117.89      | ✗              | ✓         | 42 [O3]    | 144 [O.co2]   |
| 2     | 33A     | ASN | 2.04         | 2.95         | 153.17      | ✓              | ✓         | 172 [Nam]  | 42 [O3]       |
| 3     | 34A     | HIS | 3.44         | 3.96         | 115.37      | ✗              | ✓         | 38 [O3]    | 183 [N2]      |
| 4     | 34A     | HIS | 3.02         | 3.97         | 162.71      | ✗              | ✓         | 43 [O3]    | 183 [N2]      |
| 5     | 37A     | GLU | 2.27         | 2.78         | 111.74      | ✗              | ✓         | 41 [O3]    | 206 [O.co2]   |
| 6     | 403E    | ARG | 2.47         | 3.09         | 120.88      | ✓              | ✓         | 5466 [Ng+] | 41 [O3]       |
| 7     | 408E    | ARG | 2.12         | 2.80         | 123.90      | ✓              | ✓         | 5505 [Ng+] | 37 [O3]       |
| 8     | 409E    | GLN | 2.52         | 2.99         | 108.85      | ✓              | ✓         | 5514 [Nam] | 36 [O3]       |
| 9     | 453E    | TYR | 1.98         | 2.87         | 158.58      | ✓              | ✓         | 5859 [O3]  | 39 [O.co2]    |

**Figure S5:** The detailed interaction of Annomuricin C against SARS-CoV-2 spike protein.

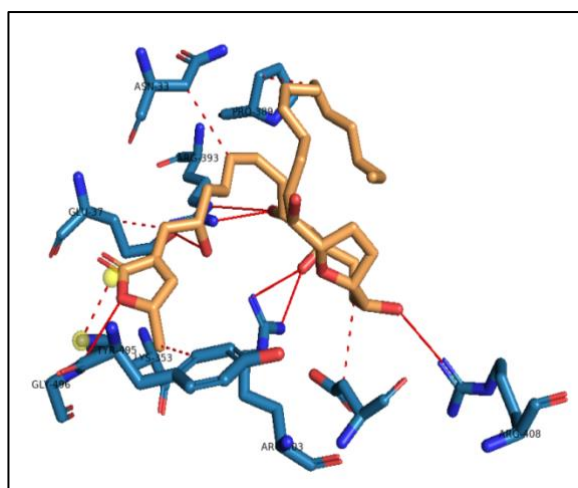

Hydrophobic Interactions ----

| Index | Residue | AA  | Distance | Ligand Atom | Protein Atom |
|-------|---------|-----|----------|-------------|--------------|
| 1     | 33A     | ASN | 3.75     | 26          | 169          |
| 2     | 37A     | GLU | 3.50     | 30          | 201          |
| 3     | 389A    | PRO | 3.76     | 14          | 3049         |
| 4     | 405E    | ASP | 3.75     | 1           | 5475         |
| 5     | 495E    | TYR | 3.68     | 34          | 6187         |

Hydrogen Bonds —

| Index | Residue | AA  | Distance H-A | Distance D-A | Donor Angle | Protein donor? | Sidechain | Donor Atom | Acceptor Atom |
|-------|---------|-----|--------------|--------------|-------------|----------------|-----------|------------|---------------|
| 1     | 37A     | GLU | 2.39         | 2.97         | 118.18      | ✘              | ✓         | 41 [O3]    | 205 [O.co2]   |
| 2     | 393A    | ARG | 1.94         | 2.92         | 169.79      | ✓              | ✓         | 3089 [Ng+] | 42 [O3]       |
| 3     | 393A    | ARG | 3.20         | 3.92         | 132.55      | ✘              | ✓         | 42 [O3]    | 3086 [Ng+]    |
| 4     | 403E    | ARG | 2.04         | 2.96         | 155.37      | ✓              | ✓         | 5466 [Ng+] | 43 [O3]       |
| 5     | 403E    | ARG | 3.18         | 3.84         | 125.61      | ✓              | ✓         | 5465 [Ng+] | 43 [O3]       |
| 6     | 408E    | ARG | 2.73         | 3.21         | 110.63      | ✓              | ✓         | 5504 [Ng+] | 38 [O3]       |
| 7     | 496E    | GLY | 2.85         | 3.71         | 146.52      | ✓              | ✘         | 6193 [Nam] | 39 [O3]       |

**Supplementary Figure 6:** The detailed interaction of Muricatocin C against SARS-CoV-2 spike protein.

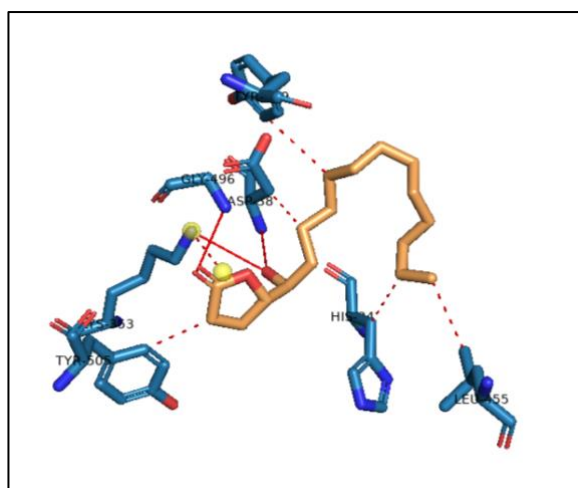

#### Hydrophobic Interactions ----

| Index | Residue | AA  | Distance | Ligand Atom | Protein Atom |
|-------|---------|-----|----------|-------------|--------------|
| 1     | 34A     | HIS | 3.71     | 16          | 150          |
| 2     | 38A     | ASP | 3.42     | 1           | 183          |
| 3     | 449E    | TYR | 3.89     | 9           | 5788         |
| 4     | 455E    | LEU | 3.81     | 17          | 5850         |
| 5     | 505E    | TYR | 3.54     | 6           | 6234         |

#### Hydrogen Bonds —

| Index | Residue | AA  | Distance H-A | Distance D-A | Donor Angle | Protein donor? | Sidechain | Donor Atom | Acceptor Atom |
|-------|---------|-----|--------------|--------------|-------------|----------------|-----------|------------|---------------|
| 1     | 38A     | ASP | 3.39         | 3.70         | 100.03      | ✓              | ✗         | 179 [Nam]  | 20 [O3]       |
| 2     | 353A    | LYS | 3.23         | 3.68         | 108.42      | ✓              | ✓         | 2736 [N3+] | 20 [O3]       |
| 3     | 496E    | GLY | 1.99         | 2.86         | 147.15      | ✓              | ✗         | 6166 [Nam] | 19 [O2]       |

**Figure S7:** The detailed interaction of Muricatacin against SARS-CoV-2 spike protein.

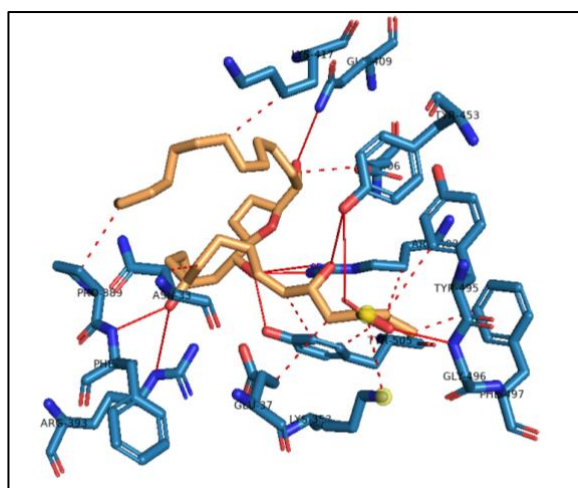

Hydrophobic Interactions ----

| Index | Residue | AA  | Distance | Ligand Atom | Protein Atom |
|-------|---------|-----|----------|-------------|--------------|
| 1     | 33A     | ASN | 3.64     | 24          | 168          |
| 2     | 37A     | GLU | 3.87     | 30          | 201          |
| 3     | 389A    | PRO | 3.68     | 18          | 3048         |
| 4     | 403E    | ARG | 3.90     | 33          | 5460         |
| 5     | 406E    | GLU | 3.64     | 8           | 5483         |
| 6     | 417E    | LYS | 3.61     | 13          | 5563         |
| 7     | 495E    | TYR | 3.90     | 32          | 6186         |
| 8     | 497E    | PHE | 3.63     | 34          | 6204         |
| 9     | 505E    | TYR | 3.68     | 33          | 6260         |
| 10    | 505E    | TYR | 3.89     | 28          | 6262         |

Hydrogen Bonds ———

| Index | Residue | AA  | Distance H-A | Distance D-A | Donor Angle | Protein donor? | Sidechain | Donor Atom | Acceptor Atom |
|-------|---------|-----|--------------|--------------|-------------|----------------|-----------|------------|---------------|
| 1     | 390A    | PHE | 2.53         | 3.01         | 109.66      | ✓              | ✗         | 3051 [Nam] | 42 [O3]       |
| 2     | 393A    | ARG | 3.22         | 4.07         | 145.99      | ✗              | ✓         | 42 [O3]    | 3085 [Ng+]    |
| 3     | 403E    | ARG | 2.37         | 3.22         | 143.29      | ✓              | ✓         | 5464 [Ng+] | 38 [O3]       |
| 4     | 403E    | ARG | 2.11         | 3.02         | 154.52      | ✓              | ✓         | 5465 [Ng+] | 38 [O3]       |
| 5     | 409E    | GLN | 2.34         | 3.18         | 142.71      | ✓              | ✓         | 5512 [Nam] | 37 [O3]       |
| 6     | 453E    | TYR | 3.11         | 4.01         | 162.10      | ✓              | ✓         | 5857 [O3]  | 39 [O.co2]    |
| 7     | 453E    | TYR | 3.31         | 3.75         | 109.43      | ✗              | ✓         | 41 [O3]    | 5857 [O3]     |
| 8     | 496E    | GLY | 2.77         | 3.19         | 106.41      | ✓              | ✗         | 6192 [Nam] | 40 [O.co2]    |
| 9     | 505E    | TYR | 2.19         | 2.80         | 119.11      | ✗              | ✓         | 38 [O3]    | 6264 [O3]     |

**Figure S8:** The detailed interaction of cis-Annonacin against SARS-CoV-2 spike protein.



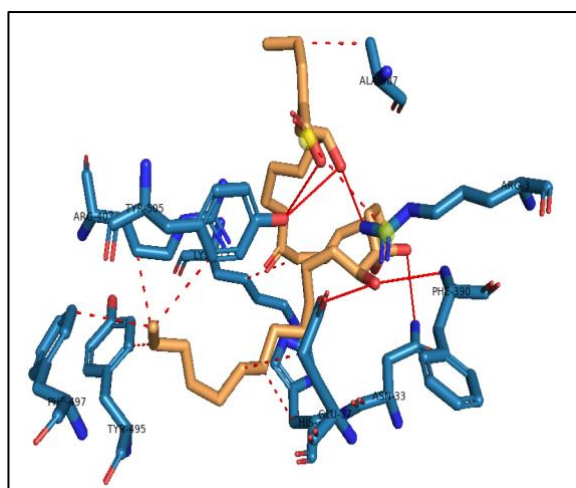

Hydrophobic Interactions ----

| Index | Residue | AA  | Distance | Ligand Atom | Protein Atom |
|-------|---------|-----|----------|-------------|--------------|
| 1     | 34A     | HIS | 3.93     | 12          | 175          |
| 2     | 37A     | GLU | 3.68     | 13          | 200          |
| 3     | 387A    | ALA | 3.57     | 33          | 3033         |
| 4     | 403E    | ARG | 3.86     | 17          | 5459         |
| 5     | 417E    | LYS | 3.93     | 22          | 5562         |
| 6     | 495E    | TYR | 3.44     | 17          | 6185         |
| 7     | 497E    | PHE | 3.92     | 18          | 6203         |
| 8     | 505E    | TYR | 3.67     | 18          | 6259         |

Hydrogen Bonds —

| Index | Residue | AA  | Distance H-A | Distance D-A | Donor Angle | Protein donor? | Sidechain | Donor Atom | Acceptor Atom |
|-------|---------|-----|--------------|--------------|-------------|----------------|-----------|------------|---------------|
| 1     | 33A     | ASN | 3.40         | 3.85         | 109.71      | ✓              | ✓         | 169 [Nam]  | 42 [O3]       |
| 2     | 37A     | GLU | 2.39         | 3.35         | 166.43      | ✗              | ✓         | 37 [O3]    | 203 [O.co2]   |
| 3     | 390A    | PHE | 2.76         | 3.30         | 115.12      | ✓              | ✗         | 3050 [Nam] | 37 [O3]       |
| 4     | 393A    | ARG | 2.24         | 3.08         | 142.53      | ✓              | ✓         | 3087 [Ng+] | 41 [O3]       |
| 5     | 505E    | TYR | 2.08         | 2.91         | 146.89      | ✓              | ✓         | 6263 [O3]  | 40 [O.co2]    |
| 6     | 505E    | TYR | 3.24         | 3.79         | 117.69      | ✗              | ✓         | 41 [O3]    | 6263 [O3]     |

**Figure S9:** The detailed interaction of Annonacin-10-one against SARS-CoV-2 spike protein.

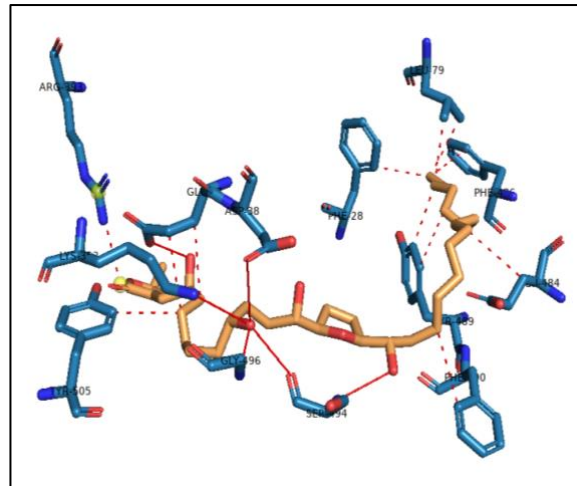

Hydrophobic Interactions - - - -

| Index | Residue | AA  | Distance | Ligand Atom | Protein Atom |
|-------|---------|-----|----------|-------------|--------------|
| 1     | 28A     | PHE | 3.37     | 20          | 122          |
| 2     | 37A     | GLU | 3.90     | 28          | 199          |
| 3     | 37A     | GLU | 3.86     | 27          | 200          |
| 4     | 79A     | LEU | 3.43     | 18          | 545          |
| 5     | 79A     | LEU | 3.50     | 20          | 546          |
| 6     | 484E    | GLU | 3.96     | 15          | 6101         |
| 7     | 486E    | PHE | 3.75     | 20          | 6116         |
| 8     | 489E    | TYR | 3.83     | 16          | 6141         |
| 9     | 489E    | TYR | 3.45     | 18          | 6143         |
| 10    | 490E    | PHE | 3.94     | 8           | 6154         |
| 11    | 505E    | TYR | 3.66     | 27          | 6261         |

Hydrogen Bonds —

| Index | Residue | AA  | Distance H-A | Distance D-A | Donor Angle | Protein donor? | Sidechain | Donor Atom | Acceptor Atom |
|-------|---------|-----|--------------|--------------|-------------|----------------|-----------|------------|---------------|
| 1     | 37A     | GLU | 1.89         | 2.70         | 137.88      | ✗              | ✓         | 41 [O3]    | 203 [O.co2]   |
| 2     | 38A     | ASP | 3.56         | 3.85         | 100.51      | ✓              | ✓         | 210 [O3]   | 42 [O3]       |
| 3     | 353A    | LYS | 2.54         | 3.38         | 138.40      | ✓              | ✓         | 2761 [N3+] | 42 [O3]       |
| 4     | 494E    | SER | 2.52         | 3.15         | 120.11      | ✓              | ✗         | 6173 [N3]  | 37 [O3]       |
| 5     | 494E    | SER | 2.12         | 3.07         | 163.62      | ✗              | ✗         | 42 [O3]    | 6176 [O2]     |
| 6     | 496E    | GLY | 2.54         | 2.96         | 105.28      | ✓              | ✗         | 6191 [Nam] | 42 [O3]       |

**Figure S10:** The detailed interaction of cis-Goniothalamicin against SARS-CoV-2 spike protein.

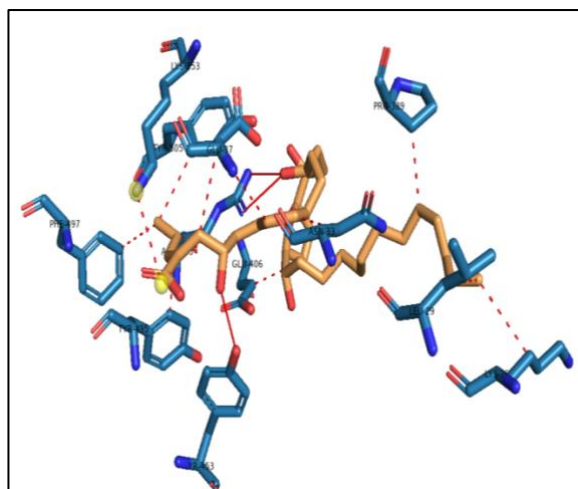

Hydrophobic Interactions - - -

| Index | Residue | AA  | Distance | Ligand Atom | Protein Atom |
|-------|---------|-----|----------|-------------|--------------|
| 1     | 26A     | LYS | 3.93     | 19          | 106          |
| 2     | 29A     | LEU | 3.76     | 19          | 132          |
| 3     | 33A     | ASN | 3.56     | 25          | 168          |
| 4     | 37A     | GLU | 3.86     | 30          | 201          |
| 5     | 37A     | GLU | 3.84     | 26          | 200          |
| 6     | 389A    | PRO | 3.57     | 15          | 3048         |
| 7     | 403E    | ARG | 3.73     | 34          | 5460         |
| 8     | 406E    | GLU | 3.93     | 5           | 5483         |
| 9     | 495E    | TYR | 3.81     | 33          | 6186         |
| 10    | 497E    | PHE | 4.00     | 34          | 6204         |
| 11    | 505E    | TYR | 3.79     | 34          | 6260         |

Hydrogen Bonds —

| Index | Residue | AA  | Distance H-A | Distance D-A | Donor Angle | Protein donor? | Sidechain | Donor Atom | Acceptor Atom |
|-------|---------|-----|--------------|--------------|-------------|----------------|-----------|------------|---------------|
| 1     | 403E    | ARG | 2.31         | 3.15         | 142.22      | ✓              | ✓         | 5465 [Ng+] | 42 [O3]       |
| 2     | 403E    | ARG | 2.04         | 2.95         | 153.97      | ✓              | ✓         | 5464 [Ng+] | 42 [O3]       |
| 3     | 453E    | TYR | 2.06         | 2.85         | 141.57      | ✓              | ✓         | 5857 [O3]  | 41 [O3]       |

**Figure S11:** The detailed interaction of Arianacin against SARS-CoV-2 spike protein.

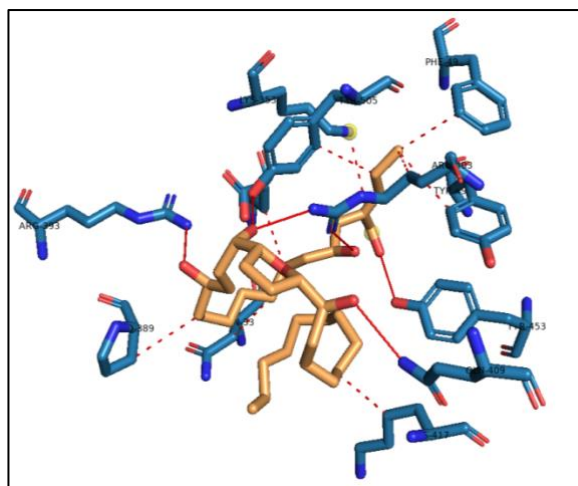

Hydrophobic Interactions ----

| Index | Residue | AA  | Distance | Ligand Atom | Protein Atom |
|-------|---------|-----|----------|-------------|--------------|
| 1     | 33A     | ASN | 3.63     | 26          | 168          |
| 2     | 37A     | GLU | 3.91     | 27          | 200          |
| 3     | 389A    | PRO | 3.96     | 23          | 3048         |
| 4     | 403E    | ARG | 3.88     | 34          | 5460         |
| 5     | 417E    | LYS | 3.73     | 11          | 5563         |
| 6     | 495E    | TYR | 3.73     | 34          | 6186         |
| 7     | 497E    | PHE | 3.68     | 34          | 6204         |
| 8     | 505E    | TYR | 3.78     | 33          | 6260         |

Hydrogen Bonds —

| Index | Residue | AA  | Distance H-A | Distance D-A | Donor Angle | Protein donor? | Sidechain | Donor Atom | Acceptor Atom |
|-------|---------|-----|--------------|--------------|-------------|----------------|-----------|------------|---------------|
| 1     | 393A    | ARG | 2.04         | 3.00         | 166.55      | ✓              | ✓         | 3088 [Ng+] | 42 [O3]       |
| 2     | 403E    | ARG | 2.07         | 2.91         | 141.92      | ✓              | ✓         | 5464 [Ng+] | 41 [O3]       |
| 3     | 403E    | ARG | 1.93         | 2.87         | 158.74      | ✓              | ✓         | 5465 [Ng+] | 38 [O3]       |
| 4     | 409E    | GLN | 2.38         | 3.23         | 145.13      | ✓              | ✓         | 5512 [Nam] | 37 [O3]       |
| 5     | 453E    | TYR | 2.10         | 3.01         | 163.61      | ✓              | ✓         | 5857 [O3]  | 40 [O.co2]    |
| 6     | 453E    | TYR | 2.63         | 3.01         | 103.93      | ✗              | ✓         | 40 [O.co2] | 5857 [O3]     |
| 7     | 505E    | TYR | 2.48         | 2.87         | 105.02      | ✓              | ✓         | 6264 [O3]  | 38 [O3]       |

**Figure S12:** The detailed interaction of Javoricin against SARS-CoV-2 spike protein.

**Optimized Molecular Structures:**

**Before Docking**

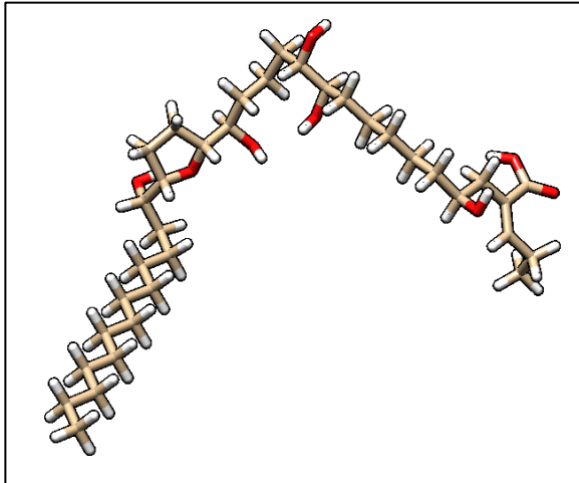

(a)

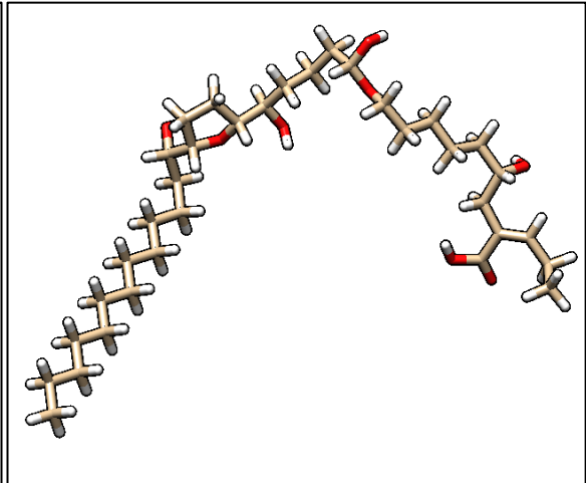

(b)

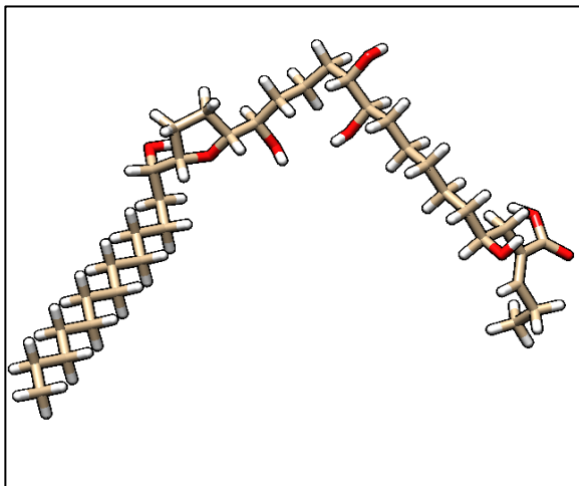

(c)

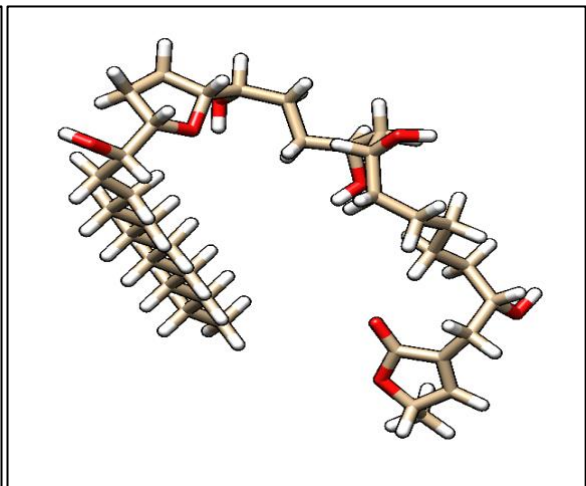

(d)

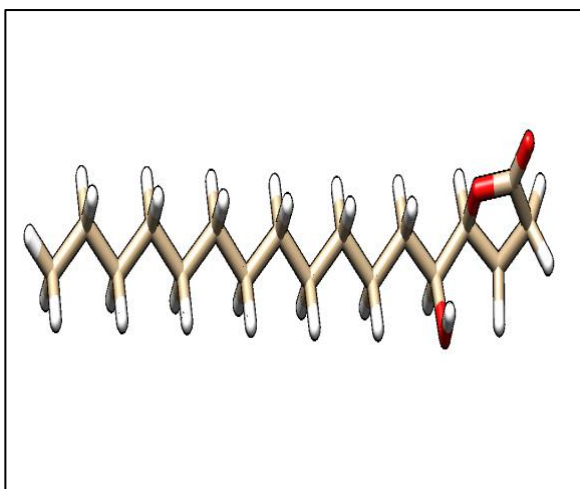

(e)

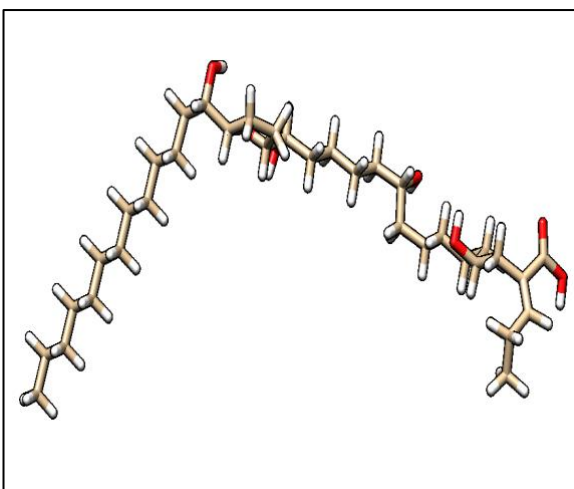

(f)

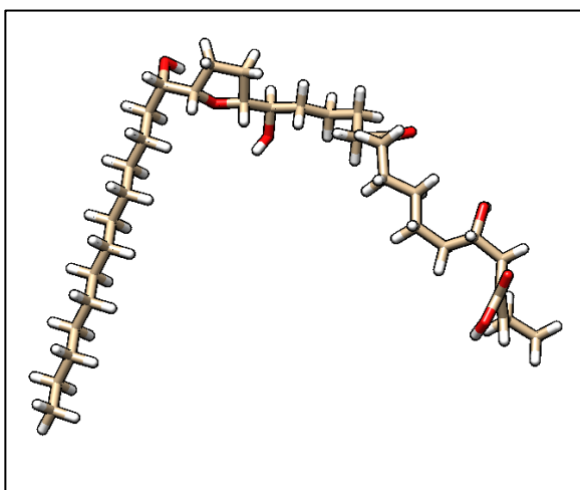

(g)

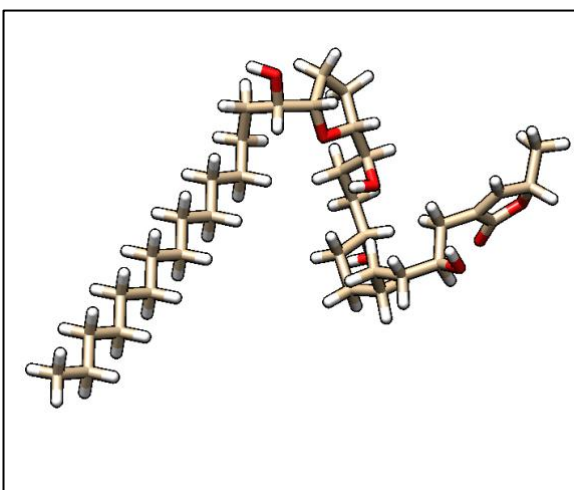

(h)

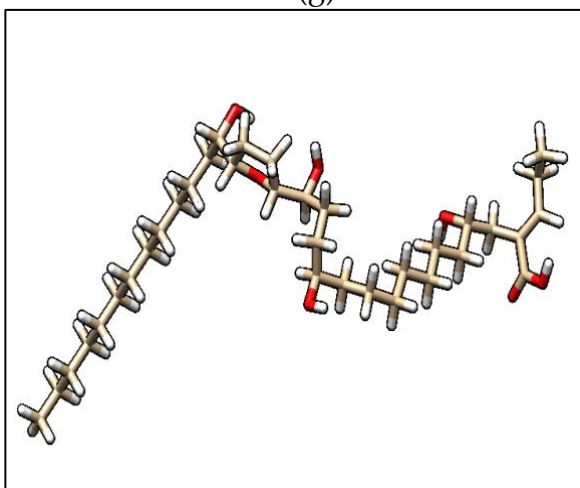

(i)

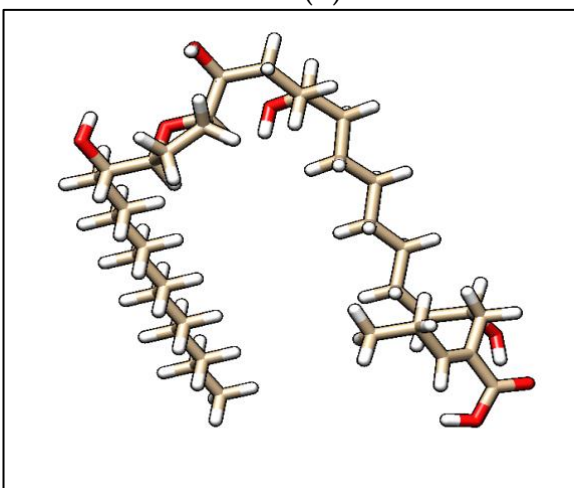

(j)

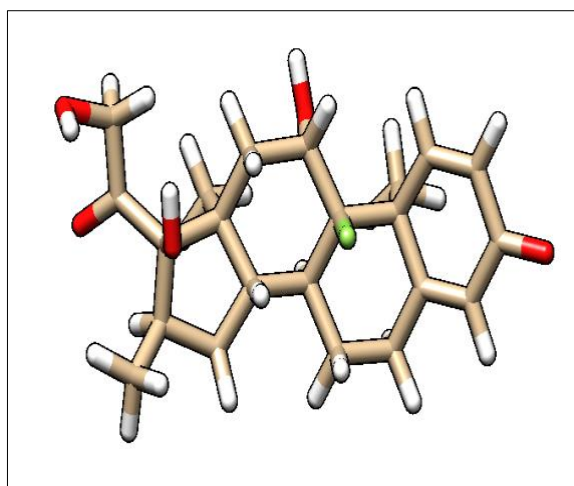

(k)

**Figure S13:** Optimized molecular structures of (a) Annomuricin A, (b) Annomuricin B, (c) Annomuricin C, (d) Muricatocin C, (e) Muricatacin, (f) cis-Annonacin, (g) Annonacin-10-one, (h) cis-Goniothalamycin, (i) Arianacin, (j) Javoricin and (k) Dexamethasone, before docking to the spike protein.

**After Docking**

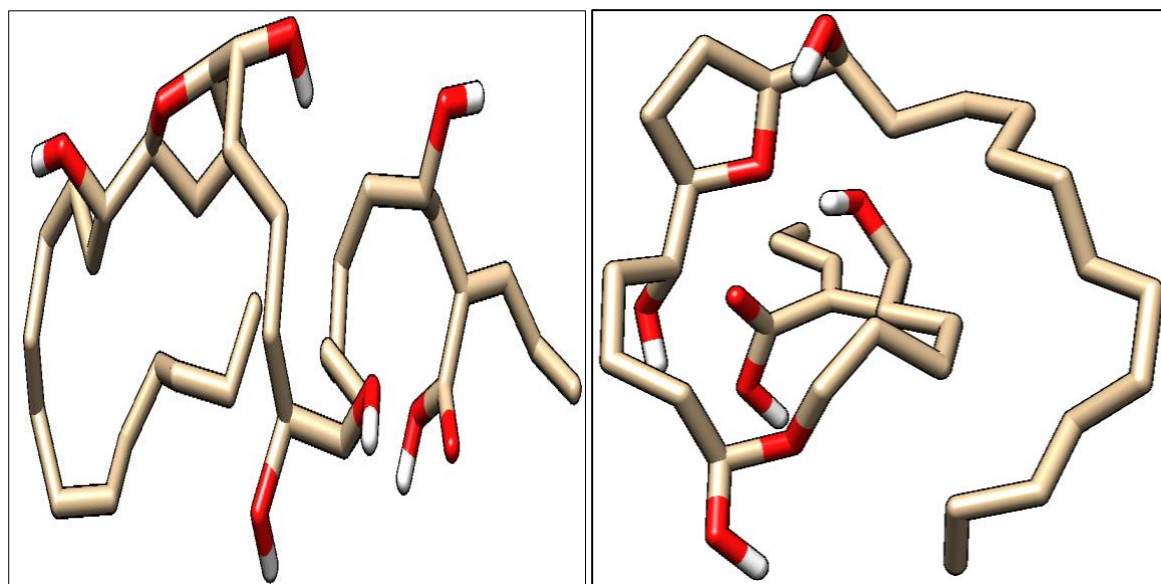

(a)

(b)

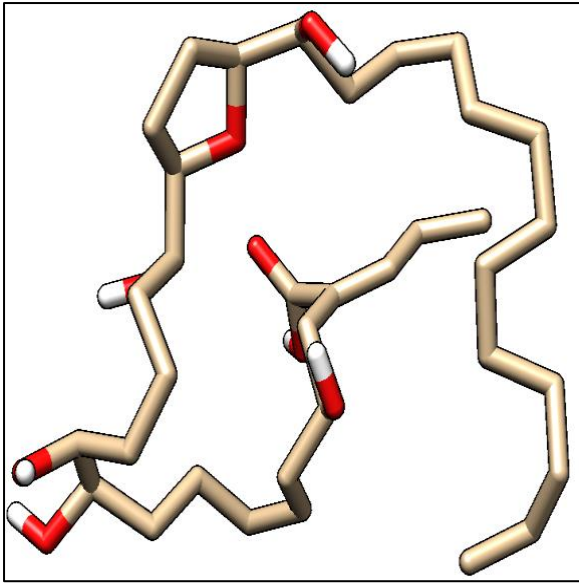

(c)

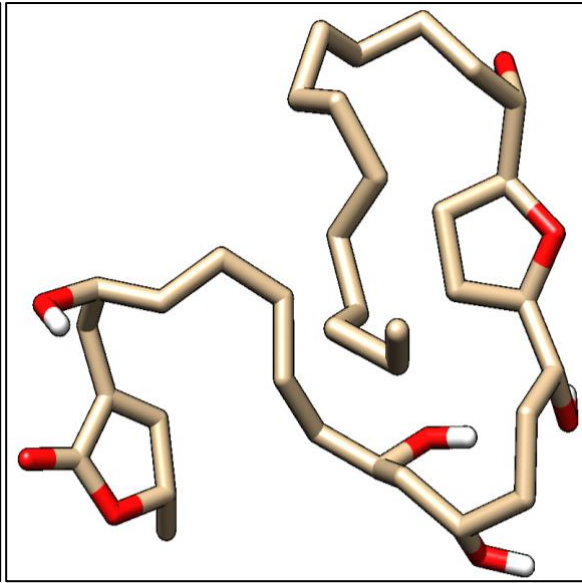

(d)

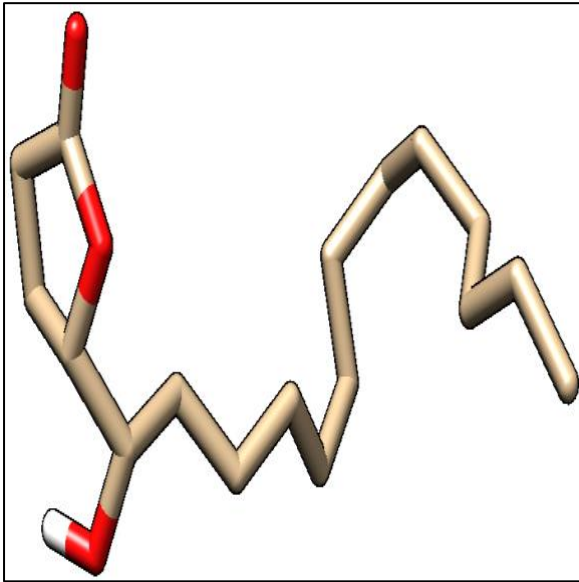

(e)

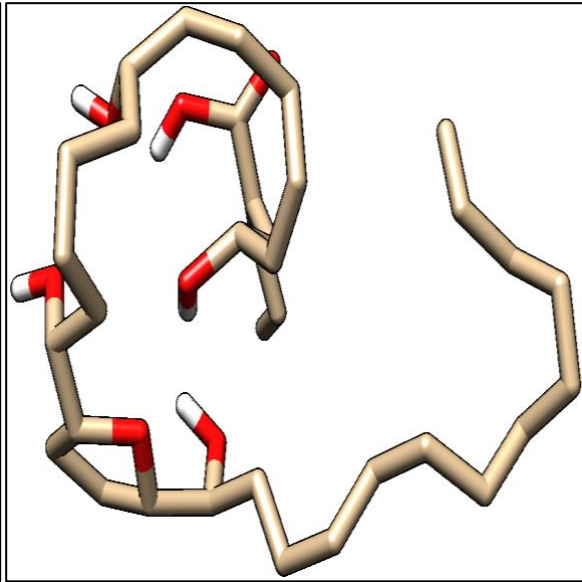

(f)

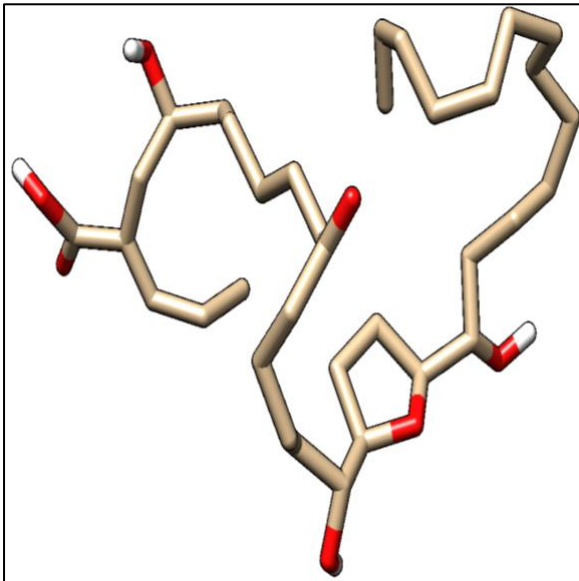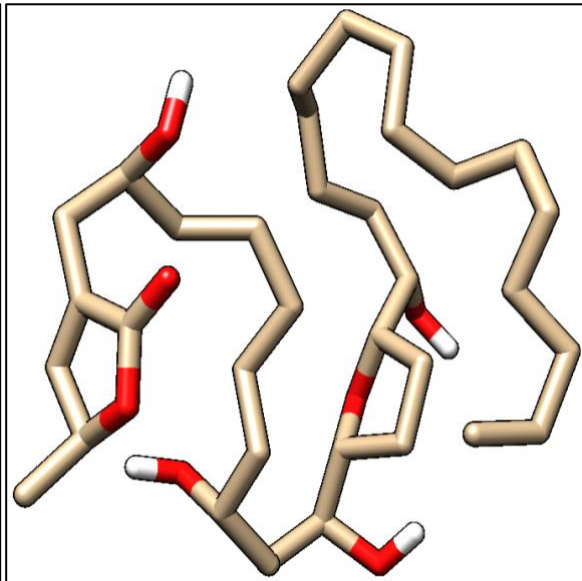



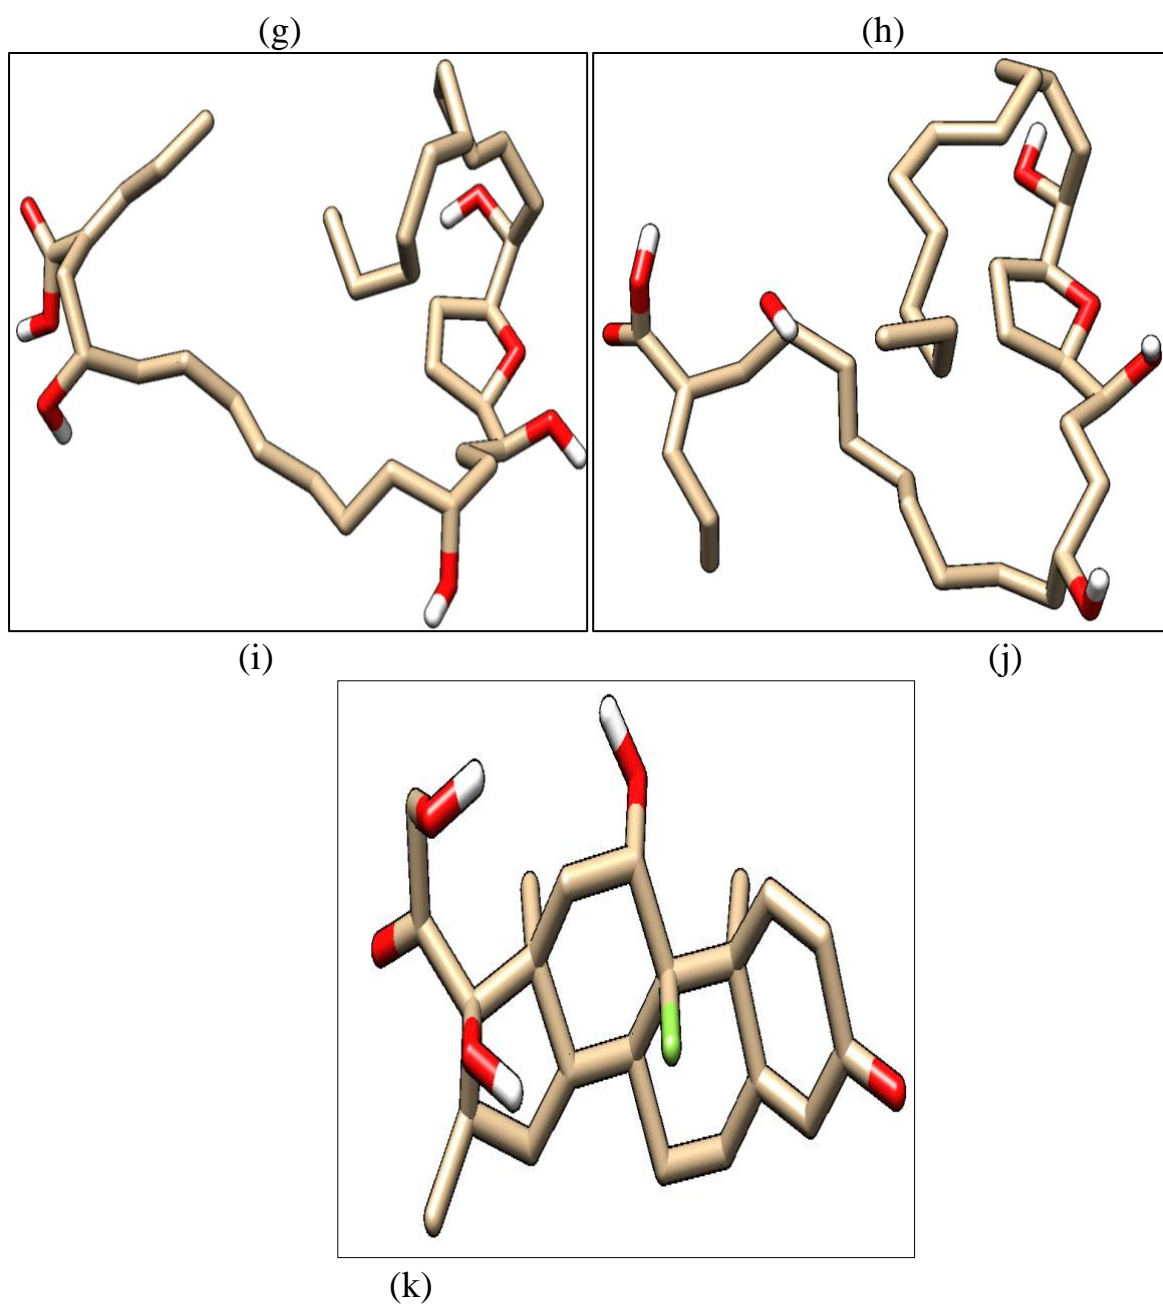

**Figure S14:** 3-dimensional pictures of the ligands obtained after the Molecular docking interaction studies (a) Annomuricin A, (b) Annomuricin B, (c) Annomuricin C, (d) Muricatocin C, (e) Muricatacin, (f) cis-Annonacin, (g) Annonacin-10-one, (h) cis-Goniothalamycin, (i) Arianacin, (j) Javoricin and (k) Dexamethasone.
